# Supplementary material for: Complex phylogeny and gene expression patterns of members of the NITRATE TRANSPORTER 1/PEPTIDE TRANSPORTER family (NPF) in wheat
Source: PubMed Central journal article supplement (PMC4176842; doi:10.1093/jxb/eru231), 2014-06-09

**Complex phylogeny and gene expression patterns of members of the NITRATE TRANSPORTER 1/PEPTIDE TRANSPORTER family (NPF) in wheat**

Peter Buchner and Malcolm J Hawkesford

Rothamsted Research, Plant Biology and Crop Science Department, West Common, Harpenden, Hertfordshire, AL5 2JQ, United Kingdom.

Supplemental material

**Table S1.** CerealsDB sequence IDs.

| <b>Wheat NPF</b> | <b>CerealsDB sequence IDs - unassembled 454 reads and Draft assembly of gene-rich regions used for assembling of coding and 5' and 3' non-coding sequences corresponding to D-genome</b> | <b>Chromosome localization</b> |
|------------------|------------------------------------------------------------------------------------------------------------------------------------------------------------------------------------------|--------------------------------|
| TaNPF1.1         | F03ZQ2H02IRBTQ contig152180                                                                                                                                                              | 3AL / 3BL / 3DL                |
| TaNPF2.1         | GGSKSHR02GAAYS contig2418439 GKL6WMX02GHZMM GKJGB6C03CWDF4 GD37MD301AOQK0 GGQO11T01DL3YR GH8MDFQ01DC3AN GMB8IBH02JPPOX F6CI9PH02IP23B                                                    | 5AS / 5BS / 5DS                |
| TaNPF2.2         | GKY3Q2G01EXDB2 F6PXR01B27VT F4JP4XR02H5O9 GH8MDFQ02CO4Y0 GG1VXPK05G6W41 F3QGDP101AP3LK GMC3H7L01DOL34 GGWF2QU01CDTA2                                                                     | 5AS / 5BS / 5DS                |
| TaNPF2.3         | contig1352322 GH95CX402F4230 GH8MDFQ05J4PHR GG7HVD103BFYN GKS5NH307GV6EH GG7JLI307GLPKV GKS7ENJ05JE9BW GDS1A9H01D4PAF                                                                    | 2AS / 2BS / 2DS                |
| TaNPF2.4         | GIB2VHM01AEDTP GHILVEO01COPML GKY3Q6201ECRO3 contig60637                                                                                                                                 | 3AL / 3BL / 3DL                |
| TaNPF2.5         | GJOJZ1301CR9VR contig30207 GEFGSVT01DIU96 GDHUJ9D02G60ZC F2S221K01B2H6G GKL6WN402IV0TB contig2722186 F01XQWW01BP4HD GGWFHOC01D8CGU                                                       | 3AL / 3BL / 3DL                |
| TaNPF4.1         | GGSKSHR02HXVN1 contig205754 GG7HVD105FSFMQ F2HXL02H2BVY GKJDY9A01BCPZ6 GJ6U61T01AXWEJ GKL6WN401DZT9C                                                                                     | 7AL / 7BL / 7DL                |
| TaNPF6.1         | F2SQ5YK02JG6IBn ; GKJH3DB06I3LR9 ; GD37MD302JXVII ; GHY6XPR08GFRUJ ; GKL6WN401EUJ2R ; GCSAYRC01ANI94 ; contig1039456 ; GDEB4RJ02JNV55                                                    | 7AL / 7BL / 7DL                |
| TaNPF6.2         | contig596501 GKK8K0002HS9C7 GINEZBA03BGKK3 contig2287968 F4H0DWW02H894P GKS7ENJ02DQ8PM GKS7ENJ02DQ8PM contig591497                                                                       | 1AL / 1BL / 1DL                |
| TaNPF6.3         | Contig161152 GKY3Q6202J0YM9 F6JU48R01B3ZPH GINDECP06IA5KX GGWH0HJ01CHX81 F2HXL02H2FX2Q1 contig1167925                                                                                    | 1AL / 1BL / 1DL                |
| TaNPF6.4         | contig157382 GG1XCTX01BCEPJ GG1XLLD07G5TW6 GINDECP05GKGE7 contig414417 GKYNZJQ01AU0RD GIABLPU02ERUNP                                                                                     | 5AL / 4BS / 4DL                |
| TaNPF6.5         | contig1269752 GJVZZDM02G4KOG GAOC5IM01ATWSW F62S5NF01DDFRB GIB2VHM01EL5HJ GCT78DC01CJE48 GINEZBA06GYR97 F4S2R7Z02IBMQN contig1225807                                                     | 1AS / 1BS / 1DS                |
| TaNPF6.6         | contig1081440 GKY3Q6202JAVXM GHY6XPR02CYETF GL5C2CV02GXJPD GKF76DR02GDW2A GMC3LKS02IO07I GDH717U01ATGLX GMEN2LX01CPOIV                                                                   | 2AL / 2BL / 2DL                |
| TaNPF6.7         | GIABLPU06IQONN GIOY55M01ADTR3 F1XBOI001AO6L4 contig1887750 contig1480399 GINDECP05ISYBI GJZO2FP02JSR65                                                                                   | 5AL / 5BL / 5DL                |
| TaNPF7.1         | GIPCY5M02H2312 GIOY55M01AGWBO GKJH3DB02CN9O6 GKS7ENJ06F6RMA F3THAEN01DMY0Y F6JU48R01B7NJZ GD9UPD201A6WXU GINEZBA06GOH0L GGWE0EB01EM0IR GH99TNM07IUN0P                                    | 6AL / 6BL / 6DL                |
| TaNPF7.1         | contig62756 GG1VXPK02CBVN9 F676MBK02IAGI3 F676MBK02IAGI3 GD4IG1U02JQ9GQ GJVZZDM01EBARQ GGQTHUK02FNAZM contig679982                                                                       | 6AL / 6BL / 6DL                |

**Table S2.** Oligonucleotide primer sequences used for SYBR Green real time RT-PCR expression analysis.

| <i>Gene symbol</i> | <i>Forward primer</i>             | <i>Reverse primer</i>              |
|--------------------|-----------------------------------|------------------------------------|
| TaNPF2.1           | CGG TGG TAC AGG TTC AAG AAG TC    | CGG AGT ATA KGA AGC CCC AAA AG     |
| TaNPF2.2           | GTG GAC CTR TTC TAC CTT GTC AC    | AGC CTT CTT GGG GCT TTC ATC G      |
| TaNPF2.4/2.5       | ACA ATG GAC TGT CAC CTT GGA ACA C | TGC AGT TAG GGC GAT TAA GGA TAT GG |
| TaNPF4.1           | GCG CTC AAC TAC GTC TTC TTC TTG   | CRA AAC CTC CAT AAA TTT ACC TTG CC |
| TaNPF6.1           | CAA TCG GAC GGC CTT GAT TTC TTC   | ACG TAG GCA CAC GTG GAC GAC        |
| TaNPF6.2           | ATC GAT GCA TGC TAC TTG CGS TTC   | GCC ACC GAA TAC ACA CAA AAA CAA G  |
| TaNPF6.3           | CAY GGG AGC AAC GAC GGC TG        | ATG CGT TTC TCC TTG TAC ACG TAG    |
| TaNPF6.4           | GAA CCT CGG TGA CGA TGG TGA TGA   | AGC GGT GCC TTA ACC TCR ACA AG     |
| TaNPF6.6           | AGC AGG CRT CAR CCT CAA CAA TG    | ATT GTC CAG AAG AGG ATG CAG GTG    |
| TaNPF6.7           | GCC GAC GAG AAA TGC TAG CTG G     | CAC ATA CGG ACG TAC ATG GAA GC     |
| TaNPF7.1           | CTA CAA GAC CTG CGC CAT CTT C     | GAT GAG GTA TAG CCG CGA GGA G      |
| TaNPF7.2           | CCC AGC AGT CAA AGC AAA CAC TG    | GGA GGA ACA CCA CCA GGT TCA C      |
| TaActin3 like      | GAC GCA CAA CAG GTA TCG TGT TG    | AGC GAG GTC AAG ACG AAG GAT G      |
| TaRubiscoSSU8      | GGT GGA GGA GGT CAA GAA GGA G     | MGT CGT GAG TGA GCT GTT TAG GC     |
| TaGS1              | ATG ATC GCC GAG ACC ACC ATC C     | TCG TCC AAA TCC TCC ART GGC C      |
| TaGS2              | GAA CAT GGA CCC GTA CAC CGT G     | TSA GGT CCT TCA TAC CTT CAG CG     |
| TaGSe              | TCA CCT CCM TGA TCG CCG AGA       | CAC ACA GAW RAC AGA ACC CAT CAA AG |
| TaGSr              | GAC ATC AGG AGC AAA GCA AGG AC    | GGA GCC GTC GTA GTT CCA CTT G      |
| TaNr1              | GGC CAA TTC YTT CAT CTC CTT CTG   | TAC RTS CAC AGA TTG ATG CGT CSA    |
| TaNIR              | ACG AGG AGT AGG CCG GCT ASG AG    | ATC AGC CGC AGC CCA TCT CTR C      |
| TaNAM              | CTA CAA GAA GAT CAA CAA GGC CGC   | TCC ACG GAG TCC TCG CAC TC         |
| TaGDH2             | AGG ATG GGA GCA TTC ACC TTG G     | GGA TAT AAG AAC TKT CAT CCA CCA CG |

**Table S3.** Oligonucleotide primer sequences used for cDNA-PCR fragment cloning and sequencing including data base accession.

| <b>Wheat Nitrate transporter symbol</b> | <b>Forward primer</b>           | <b>Reverse primer</b>              | <b>EMBL data base accession</b> |
|-----------------------------------------|---------------------------------|------------------------------------|---------------------------------|
| TaNPF1.1                                | GAT CCT GCC GGT GTA CAA GAA G   | GGA GCC AGC TTT GTT GTG AAA GC     | HF545002                        |
| TaNPF2.1                                | ATC ACC CTG CTC CAR CGG ATC     | ATC ACC CTG CTC CAR CGG ATC        | HF544999                        |
| TaNPF2.2                                | CAT GTA CGA CAG GTT CGT GGT G   | TCG ASG TCR TCG CTG GCG TG         | HF545000                        |
| TaNPF2.3                                | GAC GGC YAT GAT GTC ATG CTT YTG | AGG GYG TAT GTT GAT TCC CRA GG     | HF545001                        |
| TaNPF2.4                                | GGT AGC AGG GCT TGT TGA ACA C   | CTC TGC AGG ACA AAT TCC YTC SC     | HF544994                        |
| TaNPF2.5                                | GGT AGC AGG GCT TGT TGA ACA C   | TGT GCG GGA YAA ATA TCC CGT AC     | HF544995                        |
| TaNPF4.1                                | GTS GAG GYG AAG CGC AAG AAC     | GGC AAG GTA AAT TTA TGG AGG TTT YG | HF544989                        |
| TaNPF6.1                                | GTC TTC TTC GTC GGC TCC ATC     | GAA CTT GTA GAG CTC GCC CTT G      | HF544985                        |
| TaNPF6.2                                | TCT TCC TGT CCA TCG TCG GCA TG  | AGA AGC GCA AGT AGC ATG CAT CG     | HF544986                        |
| TaNPF6.3                                | TCG GCC TCT TCC TGT CCA TYG     | GAG CTA CAC GTG TAT ACA CGG AC     | HF544987                        |
| TaNPF6.4                                | GAT CAG GCT GCA ATA GTA GAG GTG | GAA CTG TGG CAC GAT GAG GAA G      | HF544988                        |
| TaNPF6.5                                | CTG CGA GAA GAA GCG TCT CAC     | CAC ATA CGG ACG TAC ATG GAA GC     | HF544991                        |
| TaNPF6.6                                | GGA GCA GGC ATC ARC CTC AAC     | GTG CTC ATG GAC TTC ATC CTC KC     | HF544990                        |
| TaNPF6.7                                | TCC GCA CTC GTC GAG AAG AAA     | CAA ACC CCA ACG CTG CCA ART AG     | HF545004                        |
| TaNPF7.1                                | CGC SAC MAC CAT CTT CCT GTA C   | CAC CTT GCA GCT CTT CCT GTA        | HF544992                        |
| TaNPF7.2                                | CCC AGC AGT CAA AGC AAA CAC TG  | GTA GCT GAA GAA GGC CAC CTT GG     | HF544993                        |

**Figure S1.** Average rainfall and max-min air temperature at Rothamsted field trails (ROTHMET : Rothamsted meteorological records [www.era.rothamsted.ac.uk](http://www.era.rothamsted.ac.uk)). **A.** Between 01.09.2006-31.08.2007. The time period from anthesis to complete leaf 2 senescence is grey shaded. **B.** Enlargement wheat var Hereward time period from anthesis to complete senescence showing detailed daily rain fall and max-min air temperature.

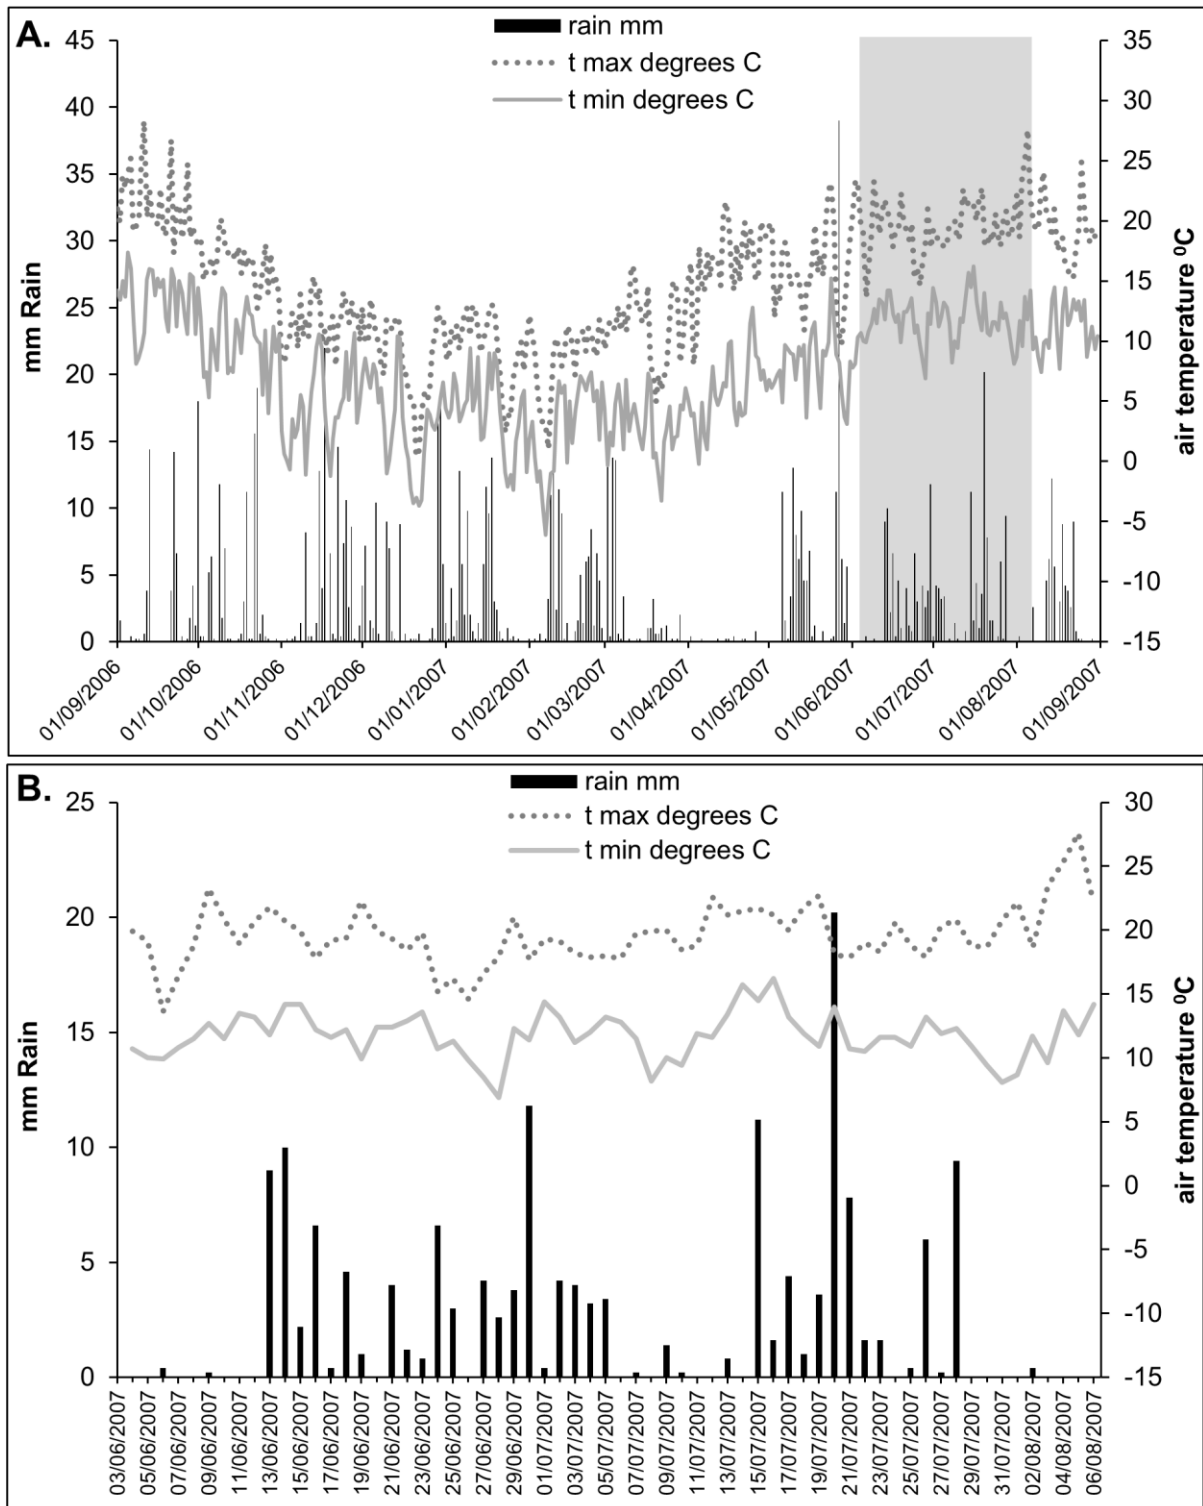

Supplement: supp_eru231_Supplemental_data___Buchner.pdf [file supp_eru231_Supplemental_data___Buchner.pdf]
